# Supplementary material for: Rnr1, but not Rnr3, facilitates the sustained telomerase-dependent elongation of telomeres
Source: PubMed Central journal article supplement (PMC5673236; doi:10.1371/journal.pgen.1007082), 2017-10-25
Supplement: pgen.1007082.s006.pdf [file pgen.1007082.s006.pdf]

|                                         |                                                       |
|-----------------------------------------|-------------------------------------------------------|
| <i>rnr1Δ crt1</i>                       | <i>rnr1::KanMX crt1 809T&gt;A</i>                     |
| <i>rnr1Δ</i>                            | <i>rnr1::HYG</i>                                      |
| <i>crt1Δ</i>                            | <i>crt1::HIS3 and crt1::KanMX</i>                     |
| <i>rnr1Δcrt1Δ</i>                       | <i>rnr1::HYG crt1::HIS3</i>                           |
| <i>rnr1Δ crt1Δ sml1Δ</i>                | <i>rnr1::Ura crt1::HIS sml1::KanMX</i>                |
| <i>sml1Δ</i>                            | <i>sml1::KanMX</i>                                    |
| <i>rnr1Δ crt1 – pEV</i>                 | <i>rnr1::KanMX crt1 809T&gt;A pEV</i>                 |
| <i>rnr1Δ crt1 – pRNR1</i>               | <i>rnr1::KanMX crt1 809T&gt;A pRNR1</i>               |
| <i>rnr1Δ crt1-pRNR1-C428A</i>           | <i>rnr1::KanMX crt1 809T&gt;A pRNR1-C428A</i>         |
| <i>RNR1/rnr1Δ CRT1/crt1Δ</i>            | <i>RNR1/ rnr1::HYG CRT1/crt1::HIS3</i>                |
| <i>elg1Δ</i>                            | <i>elg1::HYG</i>                                      |
| <i>rnr1Δ crt1 elg1Δ</i>                 | <i>rnr1::KanMX crt1 809T&gt;A elg1::HYG</i>           |
| <i>pif1Δ</i>                            | <i>pif1::KanMX</i>                                    |
| <i>rnr1Δ crt1Δ pif1Δ</i>                | <i>rnr1::HYG pif1::KanMX crt1::HIS3</i>               |
| <i>pif1Δ crt1Δ</i>                      | <i>crt1::HIS3 pif1:: KanMX</i>                        |
| wild type + <i>Cdc13</i>                | + <i>pCDC13</i>                                       |
| wild type + <i>Cdc13-Est1</i>           | + <i>pCDC13-EST1</i>                                  |
| wild type + <i>Cdc13-Est2</i>           | + <i>pCDC13-EST2</i>                                  |
| <i>rnr1Δ crt1 + Cdc13-Est1</i>          | <i>rnr1::KanMX crt1 809T&gt;A + pCDC13-EST1</i>       |
| <i>rnr1Δ crt1 + Cdc13-Est2</i>          | <i>rnr1::KanMX crt1 809T&gt;A + pCDC13-EST2</i>       |
| <i>Rnr1/rnr1Δ CRT1/crt1Δ EST2/est2Δ</i> | <i>RNR1/rnr1::HYG CRT1/crt1::HIS3 EST2/est2::URA3</i> |
| <i>rnr1Δ crt1Δ est2Δ</i>                | <i>rnr1::HYG crt1::HIS3 est2::URA</i>                 |
| <i>crt1Δ est2Δ</i>                      | <i>crt1::HIS3 est2::URA</i>                           |
| <i>est2Δ</i>                            | <i>est2::URA</i>                                      |
| <i>sml1Δ elg1Δ</i>                      | <i>sml1::HIS3 elg1::HYG</i>                           |

|                                                                                |                                                                                  |
|--------------------------------------------------------------------------------|----------------------------------------------------------------------------------|
| <i>dun1</i> Δ                                                                  | <i>dun1::KanMX</i>                                                               |
| <i>sml1</i> Δ <i>dun1</i> Δ                                                    | <i>dun1::URA3 sml1::HIS3</i>                                                     |
| <i>dun1</i> Δ <i>elg1</i> Δ                                                    | <i>dun1::KanMX elg1::HYG</i>                                                     |
| <i>sml1</i> Δ <i>dun1</i> Δ <i>elg1</i> Δ                                      | <i>dun1::KanMX elg1::HYG sml1::HIS3</i>                                          |
| <i>elg1</i> Δ <i>crt1</i> Δ                                                    | <i>crt1::KanMX elg1::HYG</i>                                                     |
| <i>dun1</i> Δ <i>crt1</i> Δ                                                    | <i>crt1::KanMX dun1::URA3</i>                                                    |
| <i>crt1</i> Δ <i>dun1</i> Δ <i>elg1</i> Δ                                      | <i>crt1::KanMX dun1::URA3 elg1::HYG</i>                                          |
| <i>MEC1/mec1</i> Δ <i>SML1/sml1</i> Δ<br><i>RNR1/rnr1</i> Δ <i>CRT1/crt1</i> Δ | <i>RNR1/rnr1::URA3 CRT1/crt1::HIS3 Mec1/mec1::HYG</i><br><i>SML1/sml1::KanMX</i> |
| <i>mec1</i> Δ <i>sml1</i> Δ                                                    | <i>mec1::HYG sml1::KanMX</i>                                                     |
| <i>mec1</i> Δ <i>crt1</i> Δ                                                    | <i>crt1::HIS3 mec1::HYG</i>                                                      |
| <i>sml1</i> Δ <i>crt1</i> Δ                                                    | <i>crt1::HIS3 sml1::KanMX</i>                                                    |
| <i>mec1</i> Δ <i>sml1</i> Δ <i>crt1</i> Δ                                      | <i>crt1::HIS3 mec1::HYG sml1::KanMX</i>                                          |
| <i>ogg1</i> Δ                                                                  | <i>ogg1::KanMX</i>                                                               |
| <i>ogg1</i> Δ <i>rnr1</i> Δ <i>crt1</i>                                        | <i>rnr1::HYG crt1 809T&gt;A ogg1::KanMX</i>                                      |
| <i>ogg1</i> Δ <i>elg1</i> Δ                                                    | <i>ogg1::KanMX elg1::HYG</i>                                                     |
| <i>ogg1</i> Δ <i>dun1</i> Δ                                                    | <i>ogg1::KanMX dun1::URA3</i>                                                    |
| <i>ppe1</i> Δ                                                                  | <i>ppe1::KanMX</i>                                                               |
| <i>ppe1</i> Δ <i>rnr1</i> Δ <i>crt1</i>                                        | <i>rnr1::HYG crt1 809T&gt;A ppe1::KanMX</i>                                      |
| <i>hsp104</i> Δ                                                                | <i>hsp104::KanMX</i>                                                             |
| <i>hsp104</i> Δ <i>rnr1</i> Δ <i>crt1</i>                                      | <i>rnr1::HYG crt1 809T&gt;A hsp104::KanMX</i>                                    |
| <i>hsp104</i> Δ <i>elg1</i> Δ                                                  | <i>hsp104::KanMX elg1::HYG</i>                                                   |
| <i>hsp104</i> Δ <i>dun1</i> Δ                                                  | <i>hsp104::KanMX dun1::URA3</i>                                                  |
| <i>RAD52/rad52</i> Δ <i>RNR1/rnr1</i> Δ<br><i>CRT1/crt1</i> Δ                  | <i>RAD52/rad52::KanMX RNR1/rnr1::HYG CRT1/crt1::HIS3</i>                         |
| <i>rnr1</i> Δ <i>crt1</i> Δ <i>rad52</i> Δ                                     | <i>rad52::KanMX rnr1::HYG crt1::HIS3</i>                                         |
| <i>crt1</i> Δ <i>rad52</i> Δ                                                   | <i>rad52::KanMX crt1::HIS3</i>                                                   |

|                                           |                                         |
|-------------------------------------------|-----------------------------------------|
| <i>rad52</i> Δ                            | <i>rad52::KanMX</i>                     |
| <i>mak31</i> Δ                            | <i>mak31::KanMX</i>                     |
| <i>mak31</i> Δ <i>elg1</i> Δ              | <i>mak31::KanMX elg1::HYG</i>           |
| <i>mak31</i> Δ <i>dun1</i> Δ              | <i>mak31::KanMX dun1::URA3</i>          |
| <i>rnr3</i> Δ                             | <i>rnr3::KanMX</i>                      |
| <i>rnr3</i> Δ <i>crt1</i> Δ               | <i>rnr3::KanMX crt1::HIS3</i>           |
| <i>rnr3</i> Δ <i>crt1</i> Δ <i>sml1</i> Δ | <i>rnr3::KanMX sml1::HYG crt1::HIS3</i> |
